# Supplementary material for: The Worst Performance Rule, or the Not-Best Performance Rule? Latent-Variable Analyses of Working Memory Capacity, Mind-Wandering Propensity, and Reaction Time
Source: PubMed Central journal article supplement (PMC7713012; doi:10.3390/jintelligence8020025), 2020-06-02

Supplemental Table 1. Zero-order correlations between cognitive predictors and ranked bin variables.

| Variable          | 1     | 2     | 3     | 4     | 5     | 6     | 7     | 8     | 9     | 10    | 11    | 12    | 13   | 14   | 15   | 16   |
|-------------------|-------|-------|-------|-------|-------|-------|-------|-------|-------|-------|-------|-------|------|------|------|------|
| 1. OPERSPAN       | 1     |       |       |       |       |       |       |       |       |       |       |       |      |      |      |      |
| 2. READSPAN       | 0.58  | 1     |       |       |       |       |       |       |       |       |       |       |      |      |      |      |
| 3. SYMMSPAN       | 0.40  | 0.38  | 1     |       |       |       |       |       |       |       |       |       |      |      |      |      |
| 4. ROTSPAN        | 0.44  | 0.32  | 0.54  | 1     |       |       |       |       |       |       |       |       |      |      |      |      |
| 5. RUNNSPAN       | 0.45  | 0.37  | 0.27  | 0.20  | 1     |       |       |       |       |       |       |       |      |      |      |      |
| 6. COUNTERS       | 0.36  | 0.23  | 0.37  | 0.29  | 0.39  | 1     |       |       |       |       |       |       |      |      |      |      |
| 7. SART-TUT       | -0.01 | -0.14 | -0.08 | 0.00  | -0.05 | -0.06 | 1     |       |       |       |       |       |      |      |      |      |
| 8. NUMS-TUT       | -0.03 | -0.11 | -0.03 | -0.03 | -0.12 | -0.02 | 0.45  | 1     |       |       |       |       |      |      |      |      |
| 9. ARRO-TUT       | 0.01  | -0.08 | -0.03 | 0.02  | -0.11 | -0.04 | 0.43  | 0.67  | 1     |       |       |       |      |      |      |      |
| 10. LETT-TUT      | 0.08  | 0.01  | -0.09 | -0.01 | 0.04  | -0.02 | 0.52  | 0.32  | 0.36  | 1     |       |       |      |      |      |      |
| 11.2BAC-TUT       | -0.05 | -0.09 | -0.06 | -0.14 | -0.20 | -0.12 | 0.39  | 0.43  | 0.41  | 0.33  | 1     |       |      |      |      |      |
| 12. SART Bin1     | 0.11  | 0.10  | 0.11  | 0.10  | 0.11  | 0.09  | -0.11 | -0.16 | -0.13 | -0.08 | -0.24 | 1     |      |      |      |      |
| 13. SART Bin3     | 0.06  | 0.08  | 0.03  | 0.03  | 0.03  | -0.01 | -0.01 | -0.12 | -0.08 | -0.02 | -0.11 | 0.85  | 1    |      |      |      |
| 14. SART Bin5     | -0.06 | -0.04 | -0.11 | -0.04 | -0.18 | -0.20 | 0.20  | 0.06  | 0.07  | 0.07  | 0.13  | 0.32  | 0.6  | 1    |      |      |
| 15. LETT Bin1     | -0.03 | 0.03  | -0.15 | -0.10 | -0.02 | -0.16 | 0.13  | 0.08  | 0.08  | 0.18  | 0.09  | 0.11  | 0.16 | 0.25 | 1    |      |
| 16. LETT Bin3     | -0.07 | 0.00  | -0.19 | -0.14 | -0.07 | -0.21 | 0.17  | 0.11  | 0.09  | 0.24  | 0.13  | 0.04  | 0.13 | 0.32 | 0.92 | 1    |
| 17. LETT Bin5     | -0.03 | -0.03 | -0.16 | -0.12 | -0.08 | -0.18 | 0.21  | 0.13  | 0.09  | 0.28  | 0.19  | -0.01 | 0.10 | 0.32 | 0.74 | 0.89 |
| 18. ARRO Bin1     | -0.08 | -0.03 | -0.14 | -0.08 | -0.13 | -0.12 | -0.05 | 0.04  | 0.07  | 0.00  | 0.03  | 0.15  | 0.15 | 0.15 | 0.43 | 0.41 |
| 19. ARRO Bin3     | -0.12 | -0.06 | -0.17 | -0.13 | -0.16 | -0.24 | 0.01  | 0.09  | 0.10  | 0.05  | 0.08  | 0.02  | 0.06 | 0.20 | 0.53 | 0.54 |
| 20. ARRO Bin5     | -0.11 | -0.05 | -0.14 | -0.14 | -0.17 | -0.25 | 0.01  | 0.13  | 0.15  | 0.07  | 0.11  | -0.05 | 0.01 | 0.19 | 0.43 | 0.47 |
| 21. CIRCFLNK Bin1 | -0.14 | -0.10 | -0.18 | -0.17 | -0.16 | -0.19 | 0.11  | 0.12  | 0.13  | 0.13  | 0.08  | 0.13  | 0.21 | 0.32 | 0.49 | 0.48 |
| 22. CIRCFLNK Bin3 | -0.17 | -0.12 | -0.20 | -0.21 | -0.17 | -0.26 | 0.13  | 0.15  | 0.16  | 0.15  | 0.11  | 0.08  | 0.18 | 0.34 | 0.5  | 0.54 |
| 23. CIRCFLNK Bin5 | -0.11 | -0.09 | -0.13 | -0.17 | -0.15 | -0.29 | 0.15  | 0.19  | 0.19  | 0.14  | 0.15  | 0.03  | 0.15 | 0.32 | 0.37 | 0.43 |
| 24. N-STROOP Bin1 | -0.08 | -0.06 | -0.13 | -0.13 | -0.09 | -0.10 | 0.04  | 0.10  | 0.09  | 0.02  | 0.04  | 0.15  | 0.20 | 0.25 | 0.45 | 0.39 |
| 25. N-STROOP Bin3 | -0.16 | -0.10 | -0.22 | -0.21 | -0.16 | -0.22 | 0.10  | 0.18  | 0.12  | 0.09  | 0.12  | 0.02  | 0.12 | 0.31 | 0.48 | 0.47 |
| 26. N-STROOP Bin5 | -0.12 | -0.06 | -0.22 | -0.17 | -0.16 | -0.23 | 0.15  | 0.26  | 0.17  | 0.18  | 0.19  | -0.07 | 0.05 | 0.32 | 0.37 | 0.41 |
| 27. S-STROOP Bin1 | -0.08 | -0.04 | -0.19 | -0.07 | -0.06 | -0.14 | -0.04 | -0.10 | -0.04 | -0.05 | -0.16 | 0.20  | 0.20 | 0.12 | 0.39 | 0.36 |
| 28. S-STROOP Bin3 | -0.09 | -0.04 | -0.17 | -0.10 | -0.10 | -0.16 | 0.03  | -0.02 | 0.01  | 0.02  | -0.05 | 0.14  | 0.17 | 0.16 | 0.39 | 0.40 |
| 29. S-STROOP Bin5 | -0.10 | -0.04 | -0.13 | -0.10 | -0.13 | -0.18 | 0.09  | 0.04  | 0.05  | 0.07  | 0.07  | 0.04  | 0.10 | 0.21 | 0.32 | 0.35 |

| Variable          | 17   | 18   | 19   | 20   | 21   | 22   | 23   | 24   | 25   | 26   | 27   | 28   |
|-------------------|------|------|------|------|------|------|------|------|------|------|------|------|
| 1. OPERSPAN       |      |      |      |      |      |      |      |      |      |      |      |      |
| 2. READSPAN       |      |      |      |      |      |      |      |      |      |      |      |      |
| 3. SYMMSPAN       |      |      |      |      |      |      |      |      |      |      |      |      |
| 4. ROTSPAN        |      |      |      |      |      |      |      |      |      |      |      |      |
| 5. RUNNSPAN       |      |      |      |      |      |      |      |      |      |      |      |      |
| 6. COUNTERS       |      |      |      |      |      |      |      |      |      |      |      |      |
| 7. SART-TUT       |      |      |      |      |      |      |      |      |      |      |      |      |
| 8. NUMS-TUT       |      |      |      |      |      |      |      |      |      |      |      |      |
| 9. ARRO-TUT       |      |      |      |      |      |      |      |      |      |      |      |      |
| 10. LETT-TUT      |      |      |      |      |      |      |      |      |      |      |      |      |
| 11.2BAC-TUT       |      |      |      |      |      |      |      |      |      |      |      |      |
| 12. SART Bin1     |      |      |      |      |      |      |      |      |      |      |      |      |
| 13. SART Bin3     |      |      |      |      |      |      |      |      |      |      |      |      |
| 14. SART Bin5     |      |      |      |      |      |      |      |      |      |      |      |      |
| 15. LETT Bin1     |      |      |      |      |      |      |      |      |      |      |      |      |
| 16. LETT Bin3     |      |      |      |      |      |      |      |      |      |      |      |      |
| 17. LETT Bin5     | 1    |      |      |      |      |      |      |      |      |      |      |      |
| 18. ARRO Bin1     | 0.30 | 1    |      |      |      |      |      |      |      |      |      |      |
| 19. ARRO Bin3     | 0.43 | 0.87 | 1    |      |      |      |      |      |      |      |      |      |
| 20. ARRO Bin5     | 0.42 | 0.69 | 0.89 | 1    |      |      |      |      |      |      |      |      |
| 21. CIRCFLNK Bin1 | 0.42 | 0.56 | 0.59 | 0.50 | 1    |      |      |      |      |      |      |      |
| 22. CIRCFLNK Bin3 | 0.49 | 0.51 | 0.61 | 0.58 | 0.88 | 1    |      |      |      |      |      |      |
| 23. CIRCFLNK Bin5 | 0.44 | 0.33 | 0.48 | 0.54 | 0.65 | 0.85 | 1    |      |      |      |      |      |
| 24. N-STROOP Bin1 | 0.32 | 0.57 | 0.57 | 0.43 | 0.57 | 0.53 | 0.32 | 1    |      |      |      |      |
| 25. N-STROOP Bin3 | 0.41 | 0.52 | 0.62 | 0.53 | 0.60 | 0.64 | 0.49 | 0.88 | 1    |      |      |      |
| 26. N-STROOP Bin5 | 0.41 | 0.29 | 0.44 | 0.45 | 0.46 | 0.57 | 0.54 | 0.60 | 0.84 | 1    |      |      |
| 27. S-STROOP Bin1 | 0.26 | 0.44 | 0.45 | 0.35 | 0.37 | 0.32 | 0.19 | 0.39 | 0.36 | 0.19 | 1    |      |
| 28. S-STROOP Bin3 | 0.33 | 0.42 | 0.47 | 0.41 | 0.38 | 0.37 | 0.29 | 0.39 | 0.40 | 0.29 | 0.92 | 1    |
| 29. S-STROOP Bin5 | 0.35 | 0.29 | 0.39 | 0.40 | 0.31 | 0.35 | 0.35 | 0.31 | 0.38 | 0.36 | 0.69 | 0.87 |

Supplemental Table 2. Zero order correlations between cognitive predictors and ex-Gaussian variables.

| Variable           | 1     | 2     | 3     | 4     | 5     | 6     | 7     | 8     | 9     | 10    | 11    | 12    | 13    | 14    | 15   | 16   |
|--------------------|-------|-------|-------|-------|-------|-------|-------|-------|-------|-------|-------|-------|-------|-------|------|------|
| 1. OPERSPAN        | 1.00  |       |       |       |       |       |       |       |       |       |       |       |       |       |      |      |
| 2. READSPAN        | 0.58  | 1.00  |       |       |       |       |       |       |       |       |       |       |       |       |      |      |
| 3. SYMMSPAN        | 0.40  | 0.38  | 1.00  |       |       |       |       |       |       |       |       |       |       |       |      |      |
| 4. ROTSPAN         | 0.44  | 0.32  | 0.54  | 1.00  |       |       |       |       |       |       |       |       |       |       |      |      |
| 5. RUNNSPAN        | 0.45  | 0.37  | 0.27  | 0.20  | 1.00  |       |       |       |       |       |       |       |       |       |      |      |
| 6. COUNTERS        | 0.36  | 0.23  | 0.37  | 0.29  | 0.39  | 1.00  |       |       |       |       |       |       |       |       |      |      |
| 7. SART-TUT        | -0.01 | -0.14 | -0.08 | 0.00  | -0.05 | -0.06 | 1.00  |       |       |       |       |       |       |       |      |      |
| 8. NUMS-TUT        | -0.03 | -0.11 | -0.03 | -0.03 | -0.12 | -0.02 | 0.45  | 1.00  |       |       |       |       |       |       |      |      |
| 9. ARRO-TUT        | 0.01  | -0.08 | -0.03 | 0.02  | -0.11 | -0.04 | 0.43  | 0.67  | 1.00  |       |       |       |       |       |      |      |
| 10. LETT-TUT       | 0.08  | 0.01  | -0.09 | -0.01 | 0.04  | -0.02 | 0.52  | 0.32  | 0.36  | 1.00  |       |       |       |       |      |      |
| 11.2BAC-TUT        | -0.05 | -0.09 | -0.06 | -0.14 | -0.20 | -0.12 | 0.39  | 0.43  | 0.41  | 0.33  | 1.00  |       |       |       |      |      |
| 12. SART Mu        | 0.10  | 0.11  | 0.10  | 0.08  | 0.13  | 0.11  | -0.13 | -0.18 | -0.15 | -0.09 | -0.21 | 1.00  |       |       |      |      |
| 13. SART Sigma     | 0.02  | 0.05  | 0.03  | 0.00  | 0.06  | 0.04  | -0.04 | -0.12 | -0.09 | -0.01 | -0.06 | 0.82  | 1.00  |       |      |      |
| 14. SART Tau       | -0.11 | -0.11 | -0.16 | -0.08 | -0.24 | -0.26 | 0.27  | 0.17  | 0.16  | 0.13  | 0.24  | -0.44 | -0.29 | 1.00  |      |      |
| 15. LETT Mu        | -0.08 | 0.02  | -0.16 | -0.13 | -0.02 | -0.17 | 0.09  | 0.07  | 0.06  | 0.14  | 0.06  | 0.04  | 0.03  | 0.20  | 1.00 |      |
| 16. LETT Sigma     | -0.19 | -0.06 | -0.19 | -0.21 | -0.09 | -0.17 | 0.03  | 0.04  | -0.01 | 0.10  | 0.03  | -0.03 | 0.02  | 0.14  | 0.70 | 1.00 |
| 17. LETT Tau       | 0.00  | -0.05 | -0.12 | -0.08 | -0.09 | -0.15 | 0.20  | 0.11  | 0.09  | 0.27  | 0.19  | -0.08 | 0.01  | 0.32  | 0.25 | 0.07 |
| 18. ARRO Mu        | -0.10 | -0.04 | -0.15 | -0.08 | -0.11 | -0.17 | -0.01 | 0.02  | 0.04  | 0.01  | 0.03  | 0.06  | 0.05  | 0.11  | 0.50 | 0.33 |
| 19. ARRO Sigma     | -0.11 | -0.07 | -0.14 | -0.13 | -0.07 | -0.25 | 0.14  | 0.04  | 0.02  | 0.09  | 0.11  | -0.17 | -0.08 | 0.26  | 0.42 | 0.34 |
| 20. ARRO Tau       | -0.08 | -0.04 | -0.11 | -0.13 | -0.15 | -0.21 | 0.02  | 0.15  | 0.16  | 0.06  | 0.12  | -0.14 | -0.11 | 0.25  | 0.21 | 0.16 |
| 21. CIRCFLNK Mu    | -0.18 | -0.11 | -0.19 | -0.18 | -0.13 | -0.15 | 0.07  | 0.02  | 0.06  | 0.11  | 0.04  | 0.09  | 0.11  | 0.19  | 0.46 | 0.29 |
| 22. CIRCFLNK Sigma | -0.15 | -0.10 | -0.13 | -0.17 | -0.05 | -0.12 | 0.05  | -0.04 | -0.04 | 0.04  | 0.01  | -0.02 | 0.02  | 0.13  | 0.27 | 0.31 |
| 23. CIRCFLNK Tau   | -0.05 | -0.06 | -0.08 | -0.12 | -0.12 | -0.27 | 0.14  | 0.21  | 0.19  | 0.11  | 0.14  | -0.01 | 0.06  | 0.26  | 0.19 | 0.16 |
| 24. N-STROOP Mu    | -0.13 | -0.10 | -0.15 | -0.17 | -0.10 | -0.12 | 0.02  | 0.04  | 0.05  | -0.01 | 0.02  | 0.10  | 0.09  | 0.10  | 0.41 | 0.23 |
| 25. N-STROOP Sigma | -0.22 | -0.14 | -0.21 | -0.22 | -0.17 | -0.24 | 0.08  | 0.07  | 0.05  | 0.06  | 0.10  | -0.20 | -0.14 | 0.23  | 0.25 | 0.27 |
| 26. N-STROOP Tau   | -0.07 | -0.02 | -0.18 | -0.11 | -0.12 | -0.21 | 0.17  | 0.27  | 0.17  | 0.19  | 0.20  | -0.15 | -0.04 | 0.37  | 0.17 | 0.10 |
| 27. S-STROOP Mu    | -0.08 | -0.04 | -0.18 | -0.07 | -0.04 | -0.11 | -0.04 | -0.10 | -0.04 | -0.05 | -0.17 | 0.22  | 0.17  | -0.08 | 0.34 | 0.19 |
| 28. S-STROOP Sigma | -0.07 | -0.03 | -0.09 | -0.10 | -0.06 | -0.06 | 0.07  | 0.04  | 0.07  | 0.04  | 0.04  | 0.06  | 0.09  | 0.02  | 0.18 | 0.17 |
| 29. S-STROOP Tau   | -0.07 | -0.02 | -0.08 | -0.10 | -0.14 | -0.16 | 0.11  | 0.10  | 0.07  | 0.09  | 0.15  | -0.07 | -0.02 | 0.21  | 0.17 | 0.12 |

| Variable           | 17   | 18   | 19   | 20   | 21   | 22   | 23   | 24   | 25    | 26   | 27   | 28   |
|--------------------|------|------|------|------|------|------|------|------|-------|------|------|------|
| 1. OPERSPAN        |      |      |      |      |      |      |      |      |       |      |      |      |
| 2. READSPAN        |      |      |      |      |      |      |      |      |       |      |      |      |
| 3. SYMMSPAN        |      |      |      |      |      |      |      |      |       |      |      |      |
| 4. ROTSPAN         |      |      |      |      |      |      |      |      |       |      |      |      |
| 5. RUNNSPAN        |      |      |      |      |      |      |      |      |       |      |      |      |
| 6. COUNTERS        |      |      |      |      |      |      |      |      |       |      |      |      |
| 7. SART-TUT        |      |      |      |      |      |      |      |      |       |      |      |      |
| 8. NUMS-TUT        |      |      |      |      |      |      |      |      |       |      |      |      |
| 9. ARRO-TUT        |      |      |      |      |      |      |      |      |       |      |      |      |
| 10. LETT-TUT       |      |      |      |      |      |      |      |      |       |      |      |      |
| 11.2BAC-TUT        |      |      |      |      |      |      |      |      |       |      |      |      |
| 12. SART Mu        |      |      |      |      |      |      |      |      |       |      |      |      |
| 13. SART Sigma     |      |      |      |      |      |      |      |      |       |      |      |      |
| 14. SART Tau       |      |      |      |      |      |      |      |      |       |      |      |      |
| 15. LETT Mu        |      |      |      |      |      |      |      |      |       |      |      |      |
| 16. LETT Sigma     |      |      |      |      |      |      |      |      |       |      |      |      |
| 17. LETT Tau       | 1.00 |      |      |      |      |      |      |      |       |      |      |      |
| 18. ARRO Mu        | 0.49 | 1.00 |      |      |      |      |      |      |       |      |      |      |
| 19. ARRO Sigma     | 0.25 | 0.16 | 1.00 |      |      |      |      |      |       |      |      |      |
| 20. ARRO Tau       | 0.58 | 0.35 | 0.23 | 1.00 |      |      |      |      |       |      |      |      |
| 21. CIRCFLNK Mu    | 0.22 | 0.31 | 0.13 | 0.53 | 1.00 |      |      |      |       |      |      |      |
| 22. CIRCFLNK Sigma | 0.15 | 0.16 | 0.46 | 0.11 | 0.00 | 1.00 |      |      |       |      |      |      |
| 23. CIRCFLNK Tau   | 0.63 | 0.34 | 0.22 | 0.59 | 0.28 | 0.10 | 1.00 |      |       |      |      |      |
| 24. N-STROOP Mu    | 0.28 | 0.43 | 0.26 | 0.28 | 0.27 | 0.24 | 0.47 | 1.00 |       |      |      |      |
| 25. N-STROOP Sigma | 0.11 | 0.24 | 0.35 | 0.18 | 0.13 | 0.48 | 0.07 | 0.18 | 1.00  |      |      |      |
| 26. N-STROOP Tau   | 0.43 | 0.12 | 0.19 | 0.36 | 0.13 | 0.07 | 0.41 | 0.13 | -0.02 | 1.00 |      |      |
| 27. S-STROOP Mu    | 0.21 | 0.06 | 0.24 | 0.24 | 0.15 | 0.17 | 0.25 | 0.17 | 0.04  | 0.65 | 1.00 |      |
| 28. S-STROOP Sigma | 0.15 | 0.21 | 0.32 | 0.10 | 0.03 | 0.32 | 0.15 | 0.17 | 0.34  | 0.20 | 0.15 | 1.00 |
| 29. S-STROOP Tau   | 1.00 | 0.49 | 0.25 | 0.58 | 0.22 | 0.15 | 0.63 | 0.28 | 0.11  | 0.43 | 0.21 | 0.15 |

Supplemental Table 3. Standardized Factor Loadings (With Standard Errors) for Latent Variable Models

| Construct and Measure   | Structural Models |                 |
|-------------------------|-------------------|-----------------|
|                         | Ranked Bin CFA    | Ex-Gaussian CFA |
| Working Memory Capacity |                   |                 |
| OPERSPAN                | .66 (.05)         | .66 (.05)       |
| READSPAN                | .52 (.05)         | .52 (.05)       |
| SYMSPAN                 | .60 (.05)         | .60 (.05)       |
| ROTSpan                 | .53 (.06)         | .53 (.06)       |
| RUNSPAN                 | .59 (.05)         | .59 (.05)       |
| COUNTERS                | .61 (.04)         | .61 (.04)       |
| TUTs                    |                   |                 |
| SART                    | .64 (.06)         | .64 (.06)       |
| LETTER FLANKER          | .50 (.06)         | .50 (.06)       |
| ARROW FLANKER           | .66 (.05)         | .66 (.05)       |
| N-STROOP                | .69 (.05)         | .69 (.05)       |
| N-BACK                  | .63 (.05)         | .63 (.05)       |
| Bin 1                   |                   |                 |
| LETTER FLANKER          | .64 (.05)         |                 |
| CIRCLE FLANKER          | .77 (.03)         |                 |
| ARROW FLANKER           | .73 (.04)         |                 |
| N-STROOP                | .79 (.03)         |                 |
| S-STROOP                | .58 (.06)         |                 |
| SART                    | .22 (.07)         |                 |
| Bin 3                   |                   |                 |
| LETTER FLANKER          | .64 (.05)         |                 |
| CIRCLE FLANKER          | .81 (.03)         |                 |
| ARROW FLANKER           | .80 (.03)         |                 |
| N-STROOP                | .83 (.03)         |                 |
| S-STROOP                | .59 (.05)         |                 |
| SART                    | .30 (.05)         |                 |
| Bin 5                   |                   |                 |
| LETTER FLANKER          | .57 (.05)         |                 |
| CIRCLE FLANKER          | .73 (.04)         |                 |

Table 3, continued. Standardized Factor Loadings (With Standard Errors) for Latent Variable Models.

| Construct and Measure | Structural Models |                 |
|-----------------------|-------------------|-----------------|
|                       | Ranked Bin CFA    | Ex-Gaussian CFA |
| Bin 5                 |                   |                 |
| ARROW FLANKER         | .73 (.04)         |                 |
| N-STROOP              | .76 (.03)         |                 |
| S-STROOP              | .50 (.05)         |                 |
| SART                  | .48 (.04)         |                 |
| Mu                    |                   |                 |
| LETTER FLANKER        |                   | .57 (.06)       |
| CIRCLE FLANKER        |                   | .77 (.04)       |
| ARROW FLANKER         |                   | .82 (.03)       |
| N-STROOP              |                   | .80 (.03)       |
| S-STROOP              |                   | .56 (.07)       |
| SART                  |                   | .16 (.06)       |
| Sigma                 |                   |                 |
| LETTER FLANKER        |                   | .39 (.10)       |
| CIRCLE FLANKER        |                   | .51 (.10)       |
| ARROW FLANKER         |                   | .68 (.05)       |
| N-STROOP              |                   | .64 (.05)       |
| S-STROOP              |                   | .39 (.07)       |
| SART                  |                   | .21 (.05)       |
| Tau                   |                   |                 |
| LETTER FLANKER        |                   | .54 (.06)       |
| CIRCLE FLANKER        |                   | .70 (.05)       |
| ARROW FLANKER         |                   | .62 (.05)       |
| N-STROOP              |                   | .70 (.04)       |
| S-STROOP              |                   | .46 (.05)       |
| SART                  |                   | .41 (.05)       |

Note. OPERSPAN = operation span; READSPAN = reading span; SYMMSPAN = symmetry span; ROTASPAN = rotation span; RUNNSPAN = running span; COUNTERS = updating counters; N-Stroop = number Stroop; S-Stroop = spatial Stroop; NS = number Stroop task; LF = letter flanker task; AF = arrow flanker task; 2B = 2-back task.

Supplemental Table 4. Multiverse Correlation Matrix between WMC, TUTs, and Ranked Bin Latent Variables

| Trials Censored to Mean + 3*IQR Outliers Inc.                     |          |         |         |         |
|-------------------------------------------------------------------|----------|---------|---------|---------|
|                                                                   | WMC      | TUT     | Bin 1   | Bin 3   |
| Bin 1                                                             | -.295*** | .090    |         |         |
| Bin 3                                                             | -.402*** | .196**  | .942*** |         |
| Bin 5                                                             | -.408*** | .326*** | .759*** | .922*** |
|                                                                   |          |         |         |         |
| Trials Censored to Mean + 3*IQR Outliers Removed                  |          |         |         |         |
| Bin 1                                                             | -.272*** | .100    |         |         |
| Bin 3                                                             | -.382*** | .219**  | .935*** |         |
| Bin 5                                                             | -.396*** | .340*** | .744*** | .922*** |
|                                                                   |          |         |         |         |
| Trials Censored to Mean + 3*IQR Outliers Censored to Mean + 3*IQR |          |         |         |         |
| Bin 1                                                             | -.284*** | .099    |         |         |
| Bin 3                                                             | -.391*** | .218**  | .936*** |         |
| Bin 5                                                             | -.404*** | .343*** | .742*** | .920*** |
|                                                                   |          |         |         |         |
| Trials Cut if > Mean + 3*IQR Outliers Inc.                        |          |         |         |         |
| Bin 1                                                             | -.289*** | .087    |         |         |
| Bin 3                                                             | -.396*** | .192**  | .943*** |         |
| Bin 5                                                             | -.415*** | .302*** | .793*** | .946*** |
|                                                                   |          |         |         |         |
| Trials Cut if > Mean + 3*IQR Outliers Removed                     |          |         |         |         |
| Bin 1                                                             | -.261*** | .103    |         |         |
| Bin 3                                                             | -.371*** | .218**  | .935*** |         |
| Bin 5                                                             | -.400*** | .325*** | .780*** | .945*** |
|                                                                   |          |         |         |         |
| Trials Cut if > Mean + 3*IQR Outliers Censored to Mean + 3*IQR    |          |         |         |         |
| Bin 1                                                             | -.277*** | .098    |         |         |
| Bin 3                                                             | -.385*** | .214**  | .937*** |         |

|                                                   |          |         |         |         |
|---------------------------------------------------|----------|---------|---------|---------|
| Bin 5                                             | -.415*** | .323*** | .780*** | .944*** |
|                                                   |          |         |         |         |
| Trials Censored to Mean + 3.5*SD Outliers Inc.    |          |         |         |         |
| Bin 1                                             | -.296*** | .091    |         |         |
| Bin 3                                             | -.404*** | .195**  | .943*** |         |
| Bin 5                                             | -.399*** | .334*** | .735*** | .902*** |
|                                                   |          |         |         |         |
| Trials Censored to Mean + 3.5*SD Outliers Removed |          |         |         |         |
| Bin 1                                             | -.272*** | .102    |         |         |
| Bin 3                                             | -.384*** | .220**  | .934*** |         |
| Bin 5                                             | -.391*** | .349*** | .719*** | .905*** |

|                                                                    |          |         |         |         |
|--------------------------------------------------------------------|----------|---------|---------|---------|
| Trials Censored to Mean + 3.5*SD Outliers Censored to Mean + 3*IQR |          |         |         |         |
|                                                                    | WMC      | TUT     | Bin 1   | Bin 3   |
| Bin 1                                                              | -.283*** | .101    |         |         |
| Bin 3                                                              | -.392*** | .219**  | .936*** |         |
| Bin 5                                                              | -.388*** | .360*** | .707*** | .895*** |
|                                                                    |          |         |         |         |
| Trials Cut if > Mean + 3.5*SD Outliers Inc.                        |          |         |         |         |
| Bin 1                                                              | -.295*** | .089    |         |         |
| Bin 3                                                              | -.401*** | .192**  | .944*** |         |
| Bin 5                                                              | -.397*** | .322*** | .767*** | .922*** |
|                                                                    |          |         |         |         |
| Trials Cut if > Mean + 3.5*SD Outliers Removed                     |          |         |         |         |
| Bin 1                                                              | -.273*** | .102    |         |         |
| Bin 3                                                              | -.383*** | .219**  | .935*** |         |
| Bin 5                                                              | -.388*** | .343*** | .749*** | .924*** |
|                                                                    |          |         |         |         |
| Trials Cut if > Mean + 3.5*SD Outliers Censored to Mean + 3*IQR    |          |         |         |         |
| Bin 1                                                              | -.283*** | .099    |         |         |



|                                                     |          |         |         |         |
|-----------------------------------------------------|----------|---------|---------|---------|
| Bin 3                                               | -.389*** | .216**  | .937*** |         |
| Bin 5                                               | -.388*** | .350*** | .743*** | .917*** |
|                                                     |          |         |         |         |
| No Trials Removed Outliers Inc.                     |          |         |         |         |
| Bin 1                                               | -.296*** | .092    |         |         |
| Bin 3                                               | -.405*** | .196**  | .942*** |         |
| Bin 5                                               | -.398*** | .347*** | .722*** | .893*** |
|                                                     |          |         |         |         |
| No Trials Removed Outliers Removed                  |          |         |         |         |
| Bin 1                                               | -.273*** | .105    |         |         |
| Bin 3                                               | -.384*** | .222**  | .935*** |         |
| Bin 5                                               | -.397*** | .356*** | .721*** | .906*** |
|                                                     |          |         |         |         |
| No Trials Removed Outliers Censored to Mean + 3*IQR |          |         |         |         |
| Bin 1                                               | -.282*** | .102    |         |         |
| Bin 3                                               | -.393*** | .221**  | .936*** |         |
| Bin 5                                               | -.387*** | .367*** | .698*** | .887*** |

Supplemental Table 5. Multiverse Correlation Matrix between WMC, TUTs, and Ex-Gaussian Latent Variables

| Trials Censored to Mean + 3*IQR Outliers Inc.                     |          |         |         |         |
|-------------------------------------------------------------------|----------|---------|---------|---------|
|                                                                   | WMC      | TUT     | Mu      | Sigma   |
| Mu                                                                | -.309**  | .032    |         |         |
| Sigma                                                             | -.481*** | .167*   | .760**  |         |
| Tau                                                               | -.357*** | .395*** | .405**  | .612*** |
|                                                                   |          |         |         |         |
| Trials Censored to Mean + 3*IQR Outliers Removed                  |          |         |         |         |
| Mu                                                                | -.272*** | .046    |         |         |
| Sigma                                                             | -.473*** | .184*   | .708*** |         |
| Tau                                                               | -.349*** | .404*** | .388*** | .561*** |
|                                                                   |          |         |         |         |
| Trials Censored to Mean + 3*IQR Outliers Censored to Mean + 3*IQR |          |         |         |         |
| Mu                                                                | -.293*** | .044    |         |         |
| Sigma                                                             | -.483*** | .183*   | .723*** |         |
| Tau                                                               | -.352*** | .403*** | .382*** | .579*** |
|                                                                   |          |         |         |         |
| Trials Cut if > Mean + 3*IQR Outliers Inc.                        |          |         |         |         |
| Mu                                                                | -.326**  | .051    |         |         |
| Sigma                                                             | -.496*** | .192*   | .767*** |         |
| Tau                                                               | -.360*** | .391*** | .476*** | .706*** |
|                                                                   |          |         |         |         |
| Trials Cut if > Mean + 3*IQR Outliers Removed                     |          |         |         |         |
| Mu                                                                | -.290*** | .071    |         |         |
| Sigma                                                             | -.485*** | .212**  | .720*** |         |
| Tau                                                               | -.360*** | .404*** | .482*** | .655*** |
|                                                                   |          |         |         |         |
| Trials Cut if > Mean + 3*IQR Outliers Censored to Mean + 3*IQR    |          |         |         |         |
| Mu                                                                | -.310*** | .064    |         |         |
| Sigma                                                             | -.497*** | .209**  | .733*** |         |

|                                                   |          |         |         |         |
|---------------------------------------------------|----------|---------|---------|---------|
| Tau                                               | -.360*** | .397*** | .464*** | .676*** |
|                                                   |          |         |         |         |
| Trials Censored to Mean + 3.5*SD Outliers Inc.    |          |         |         |         |
| Mu                                                | -.305*** | .018    |         |         |
| Sigma                                             | -.487*** | .146^   | .756**  |         |
| Tau                                               | -.340*** | .405*** | .335**  | .528*** |
|                                                   |          |         |         |         |
| Trials Censored to Mean + 3.5*SD Outliers Removed |          |         |         |         |
| Mu                                                | -.266*** | .029    |         |         |
| Sigma                                             | -.476*** | .162*   | .699*** |         |
| Tau                                               | -.335*** | .392*** | .330**  | .494*** |

|                                                                    |          |         |         |         |
|--------------------------------------------------------------------|----------|---------|---------|---------|
| Trials Censored to Mean + 3.5*SD Outliers Censored to Mean + 3*IQR |          |         |         |         |
|                                                                    | WMC      | TUT     | Mu      | Sigma   |
| Mu                                                                 | -.289*** | .027    |         |         |
| Sigma                                                              | -.489*** | .156*   | .721*** |         |
| Tau                                                                | -.339*** | .410*** | .312**  | .499*** |
|                                                                    |          |         |         |         |
| Trials Cut if > Mean + 3.5*SD Outliers Inc.                        |          |         |         |         |
| Mu                                                                 | -.320**  | .019    |         |         |
| Sigma                                                              | -.496*** | .140^   | .765*** |         |
| Tau                                                                | -.329*** | .408*** | .370*** | .553*** |
|                                                                    |          |         |         |         |
| Trials Cut if > Mean + 3.5*SD Outliers Removed                     |          |         |         |         |
| Mu                                                                 | -.285*** | .031    |         |         |
| Sigma                                                              | -.481*** | .155*   | .713*** |         |
| Tau                                                                | -.334*** | .415*** | .366*** | .508*** |
|                                                                    |          |         |         |         |
| Trials Cut if > Mean + 3.5*SD Outliers Censored to Mean + 3*IQR    |          |         |         |         |
| Mu                                                                 | -.305*** | .029    |         |         |

|                                                     |          |         |         |         |
|-----------------------------------------------------|----------|---------|---------|---------|
| Sigma                                               | -.496*** | .151*   | .733*** |         |
| Tau                                                 | -.328*** | .416*** | .347*** | .517*** |
|                                                     |          |         |         |         |
| No Trials Removed Outliers Inc.                     |          |         |         |         |
| Mu                                                  | -.308**  | .023    |         |         |
| Sigma                                               | -.490**  | .152^   | .759*   |         |
| Tau                                                 | -.338*** | .405*** | .351**  | .544*** |
|                                                     |          |         |         |         |
| No Trials Removed Outliers Removed                  |          |         |         |         |
| Mu                                                  | -.272*** | .036    |         |         |
| Sigma                                               | -.481*** | .170*   | .706*** |         |
| Tau                                                 | -.339*** | .402*** | .340*** | .510*** |
|                                                     |          |         |         |         |
| No Trials Removed Outliers Censored to Mean + 3*IQR |          |         |         |         |
| Mu                                                  | -.293*** | .034    |         |         |
| Sigma                                               | -.496*** | .166*   | .722*** |         |
| Tau                                                 | -.337*** | .413*** | .323*** | .512*** |

Supplemental Figure 1. RT predicted by WMC x Bin for each task.

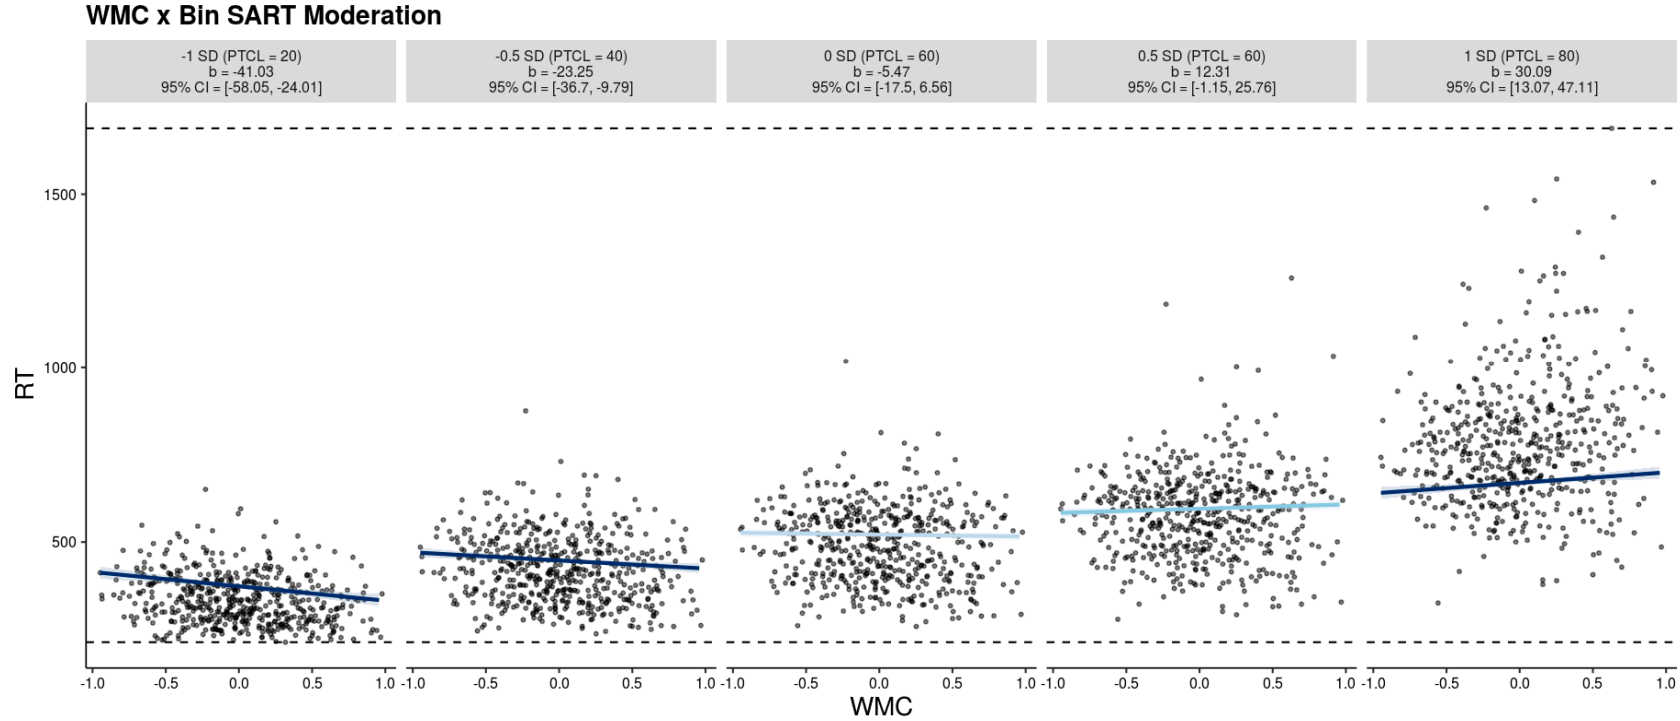

### Spatial Stroop WMC x Bin Moderation

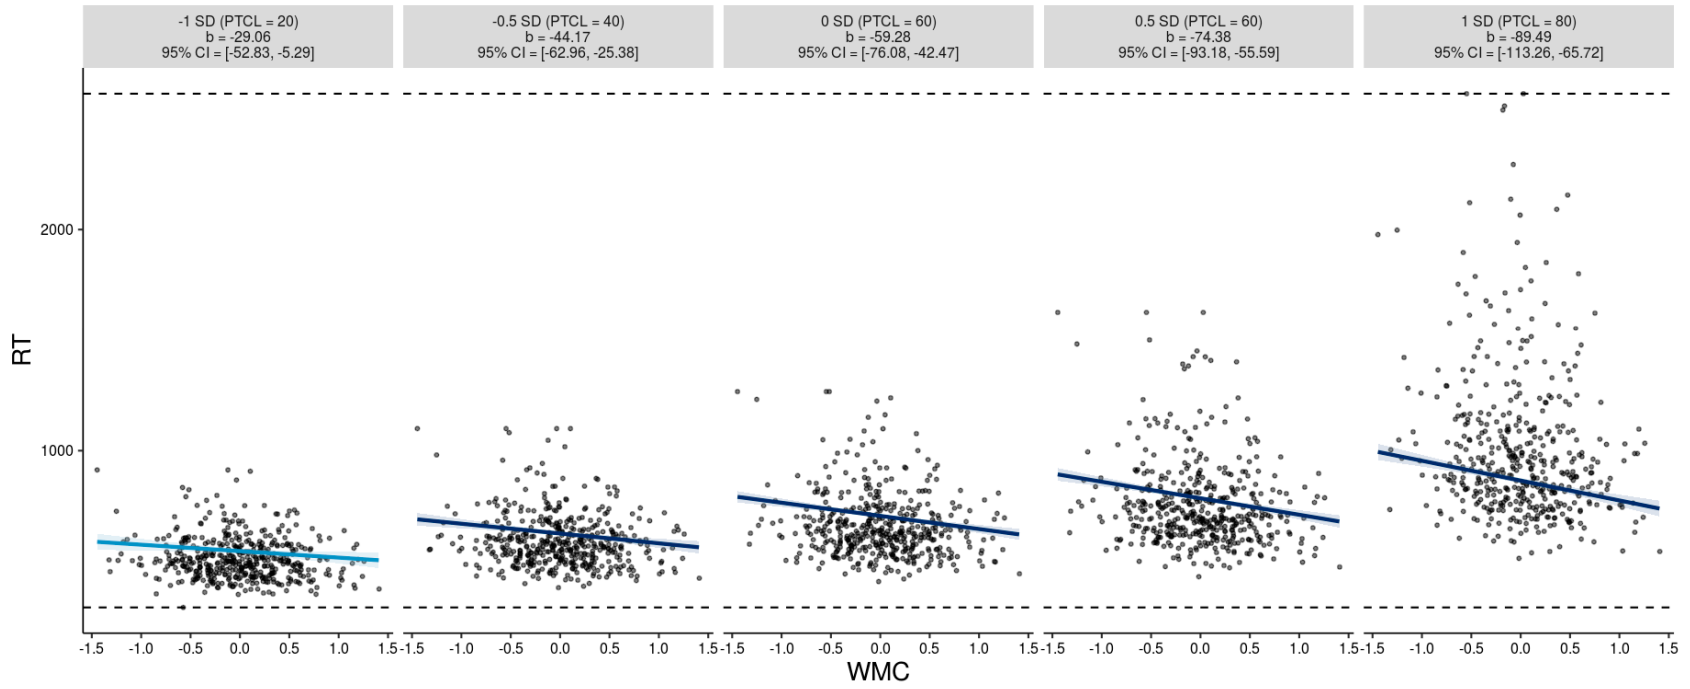

### Number Stroop WMC x Bin Moderation

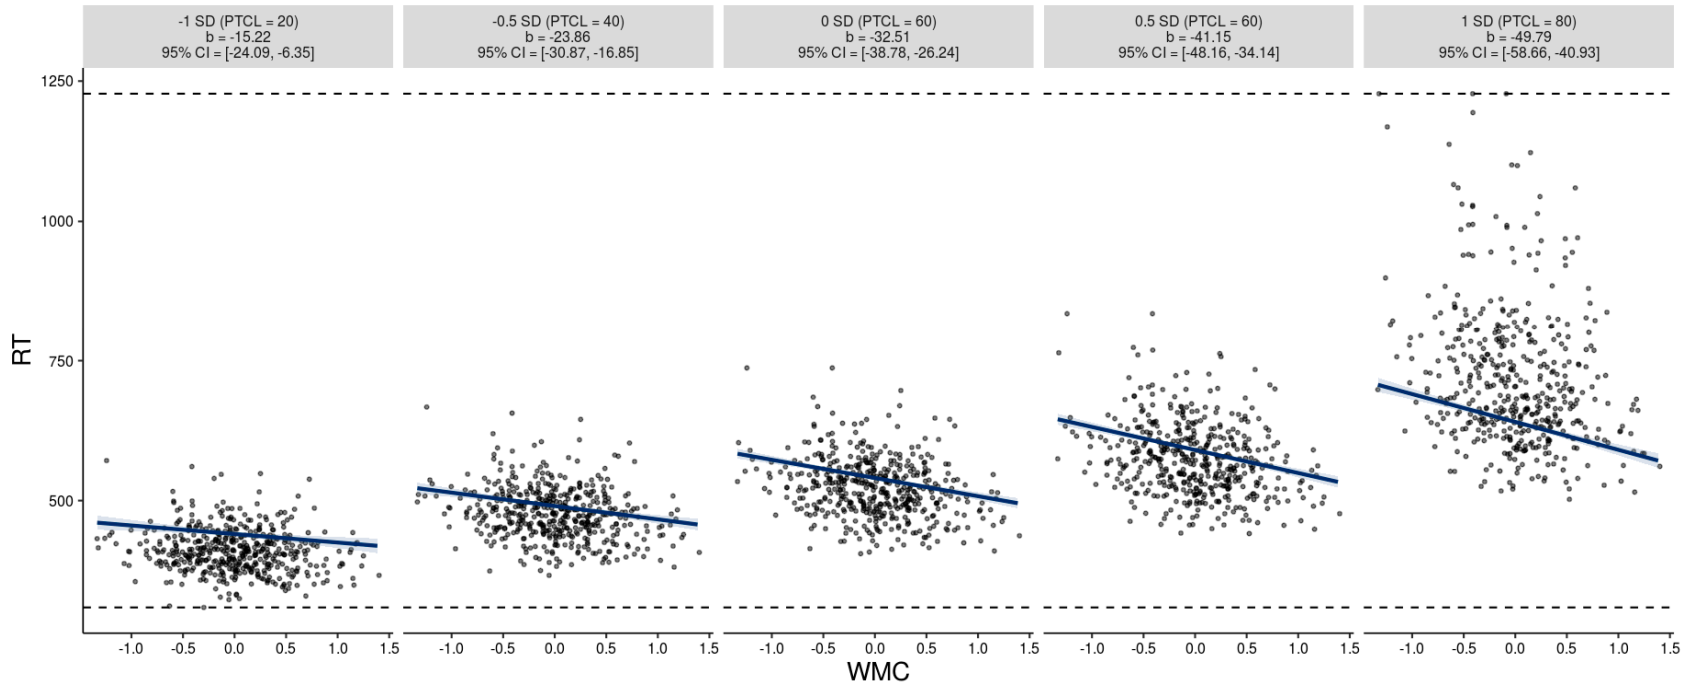

### Letter Flanker WMC x Bin Moderation

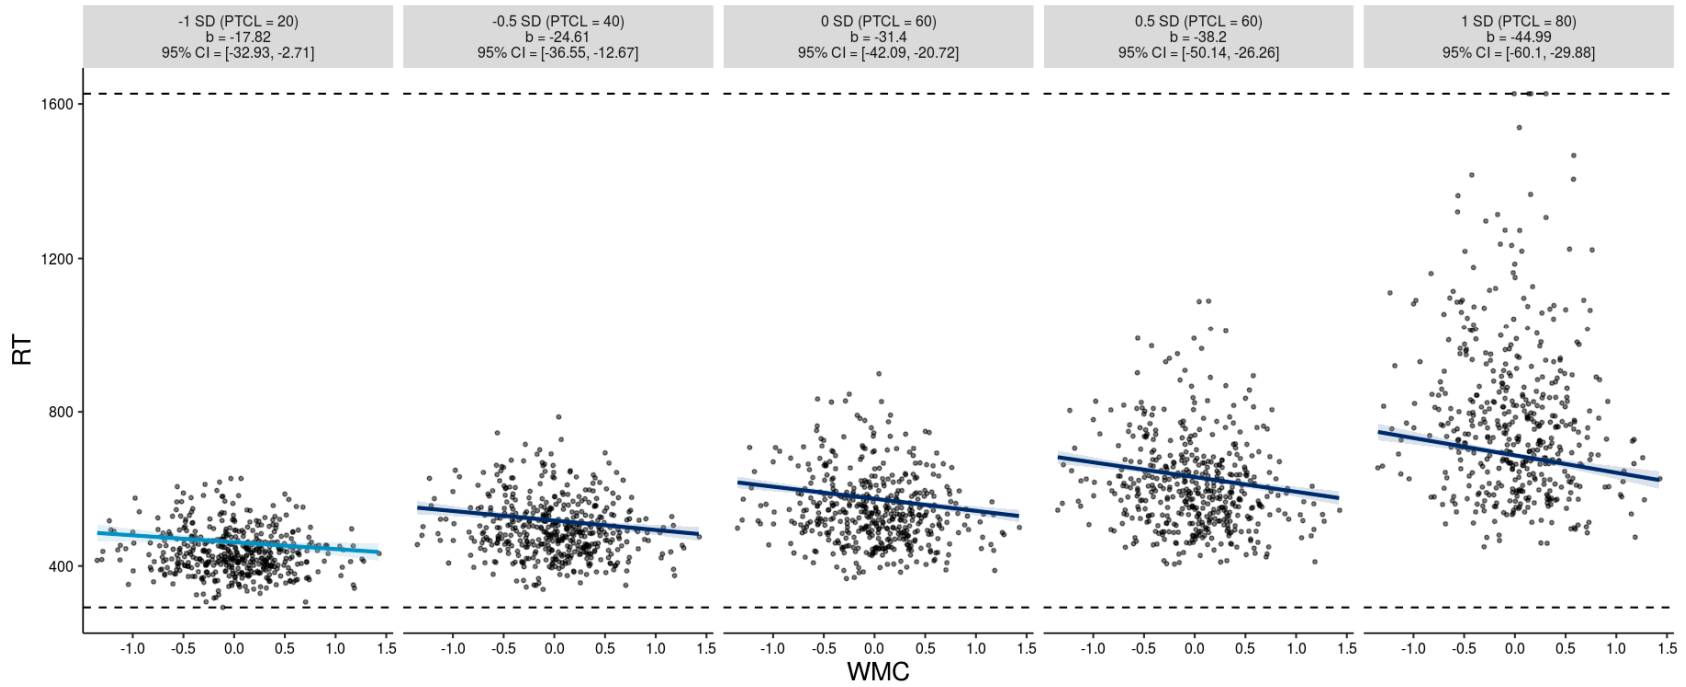



### Arrow Flanker WMC x Bin Moderation

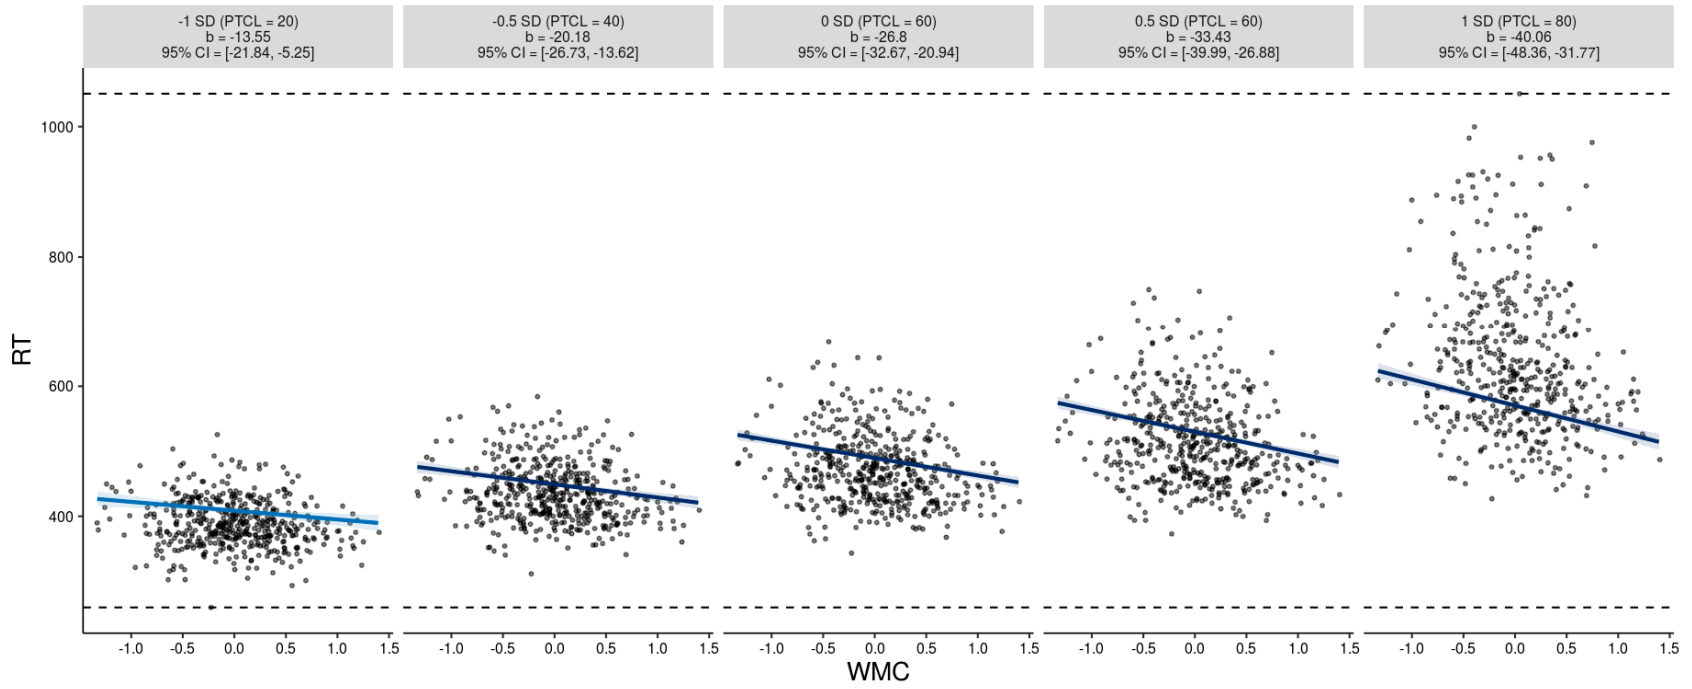

### Circle Flanker WMC x Bin Moderation

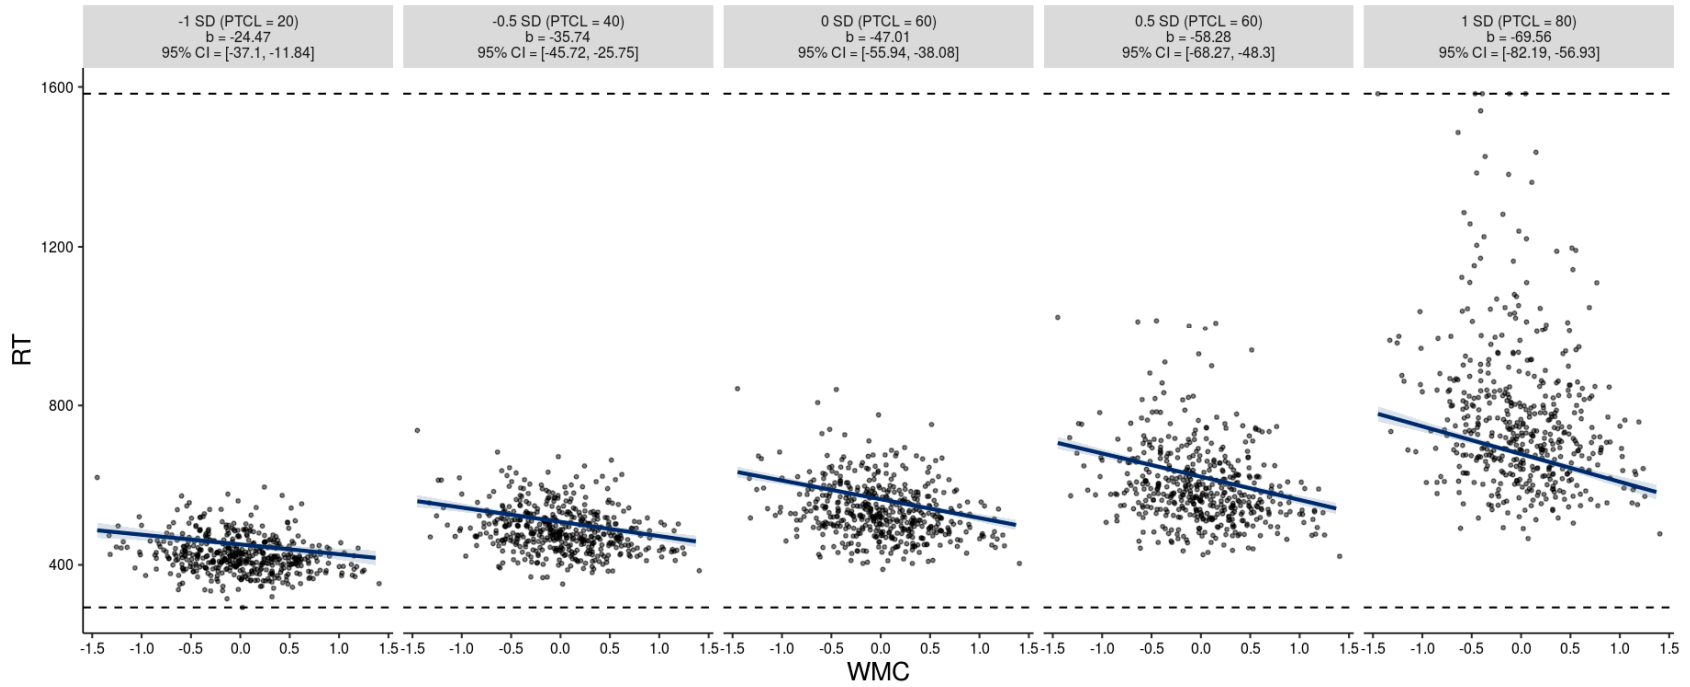

Supplemental Figure 2. RT predicted by TUT x Bin for each task.

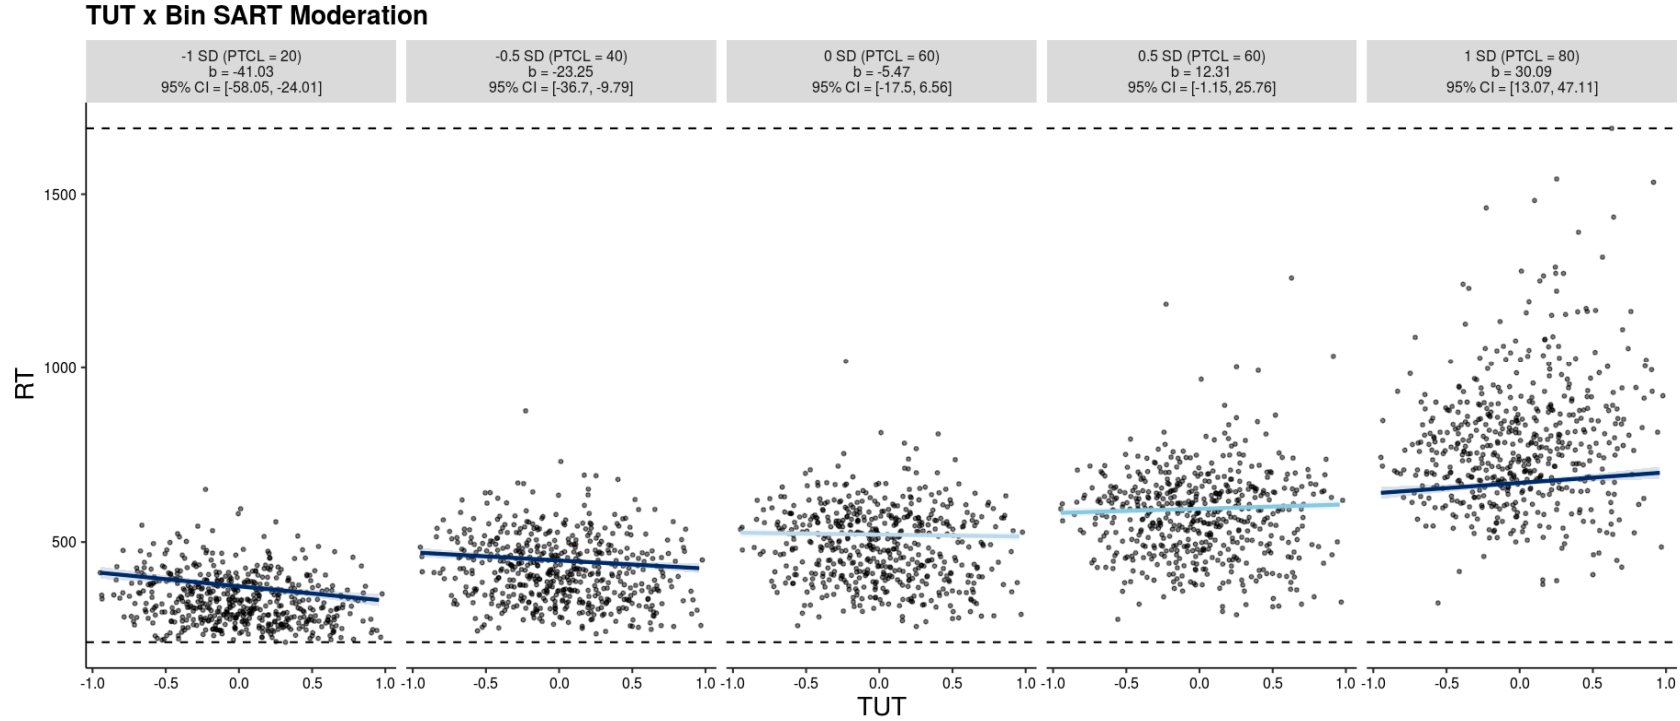

### Spatial Stroop TUT x Bin Moderation

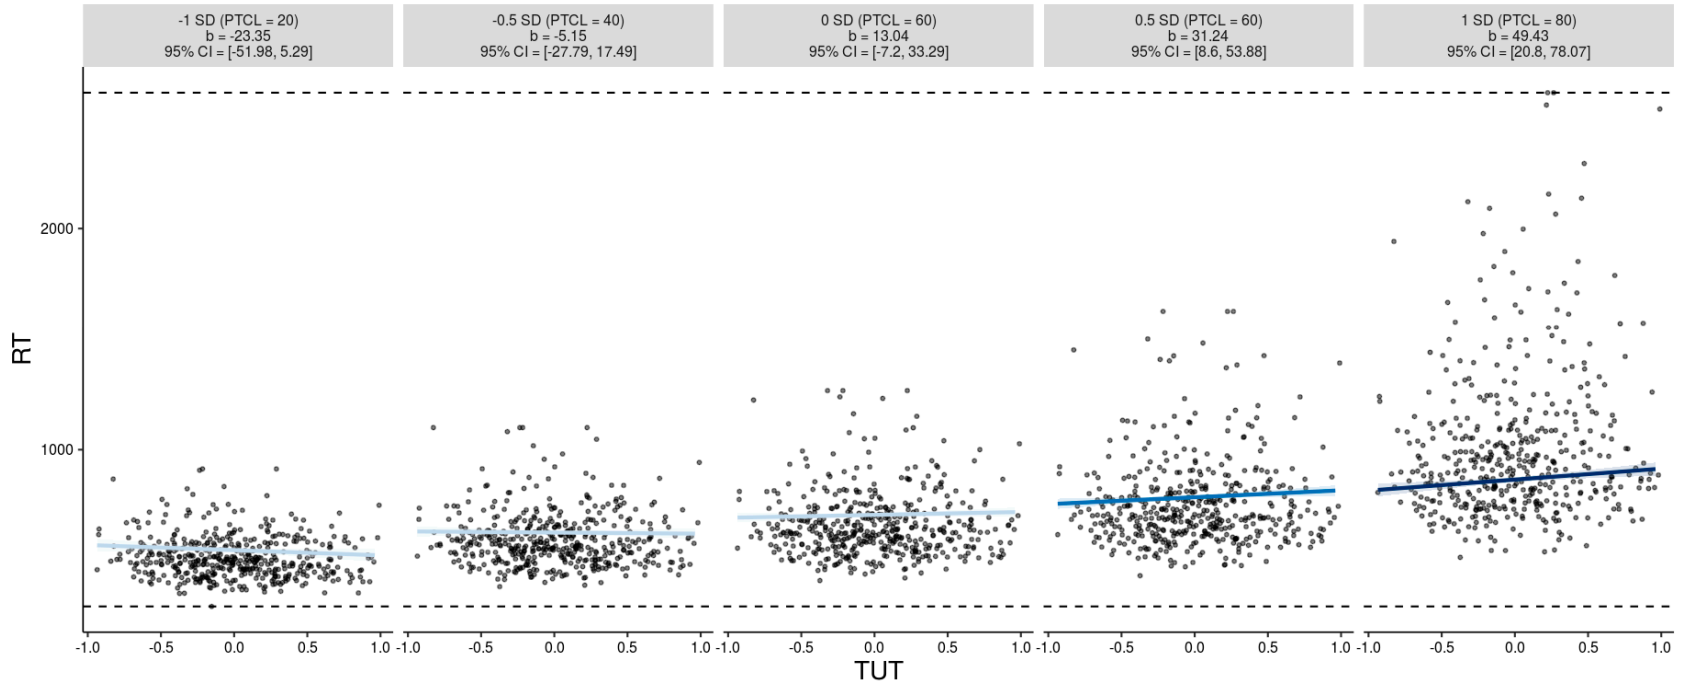

### Number Stroop TUT x Bin Moderation

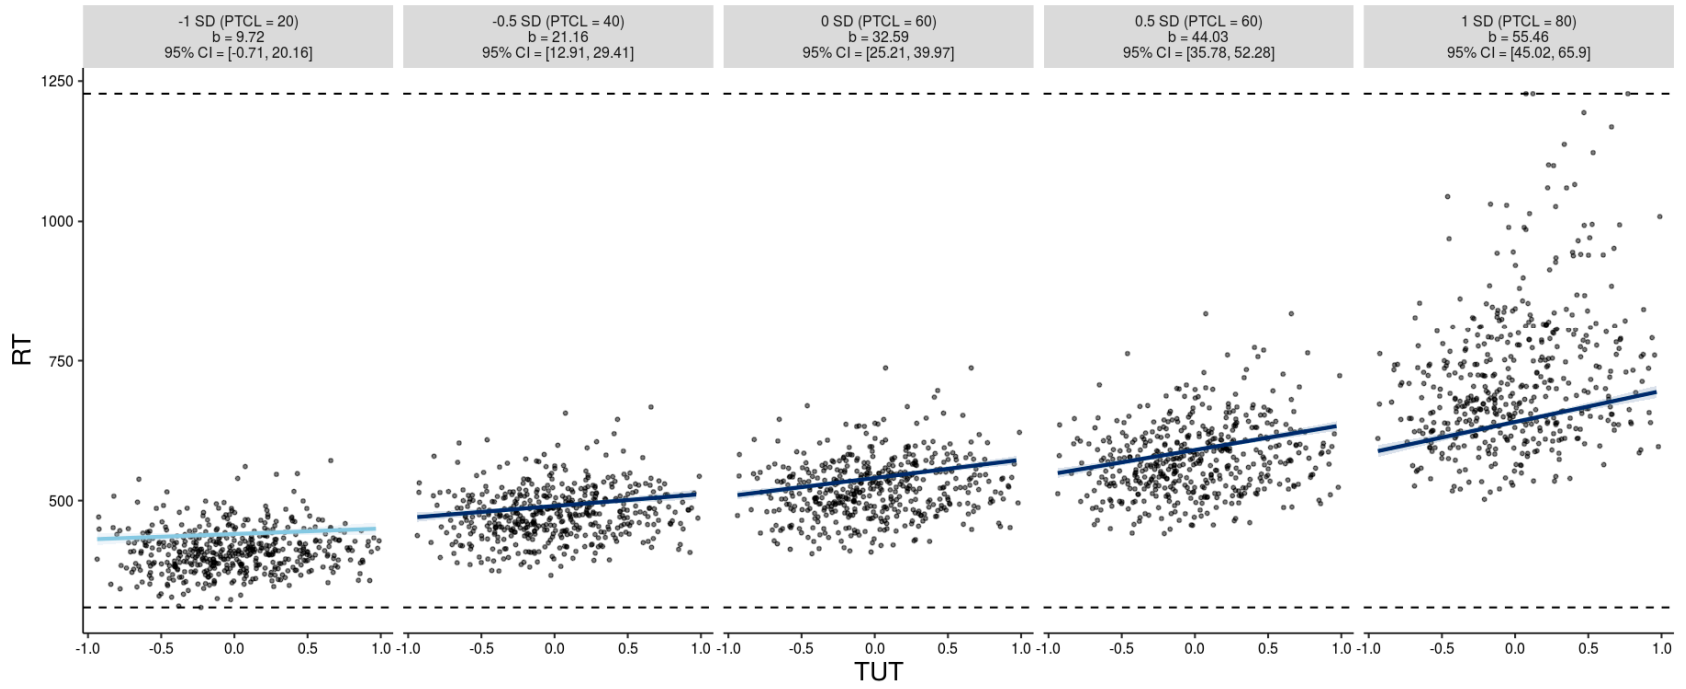

### Letter Flanker TUT x Bin Moderation

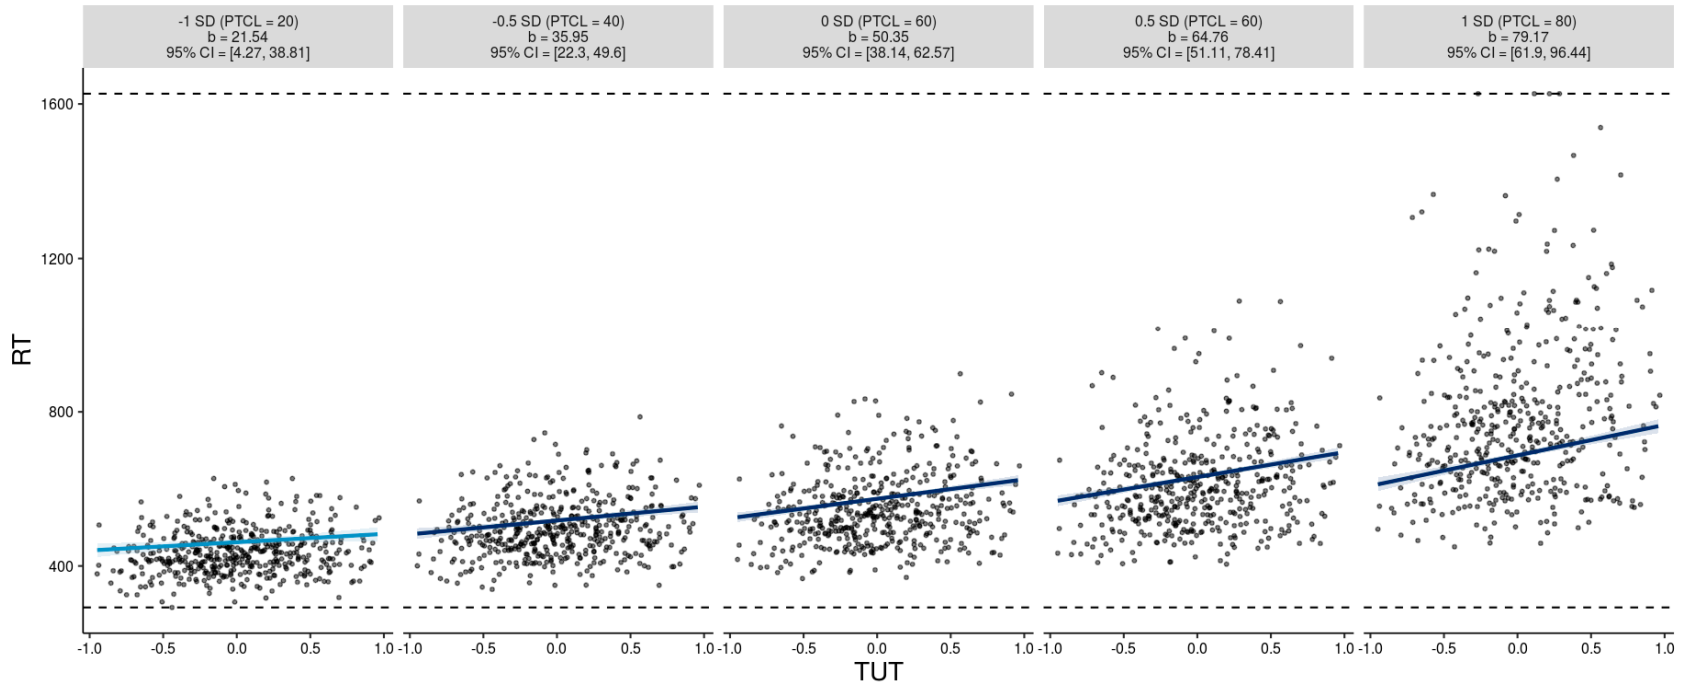

### Arrow Flanker TUT x Bin Moderation

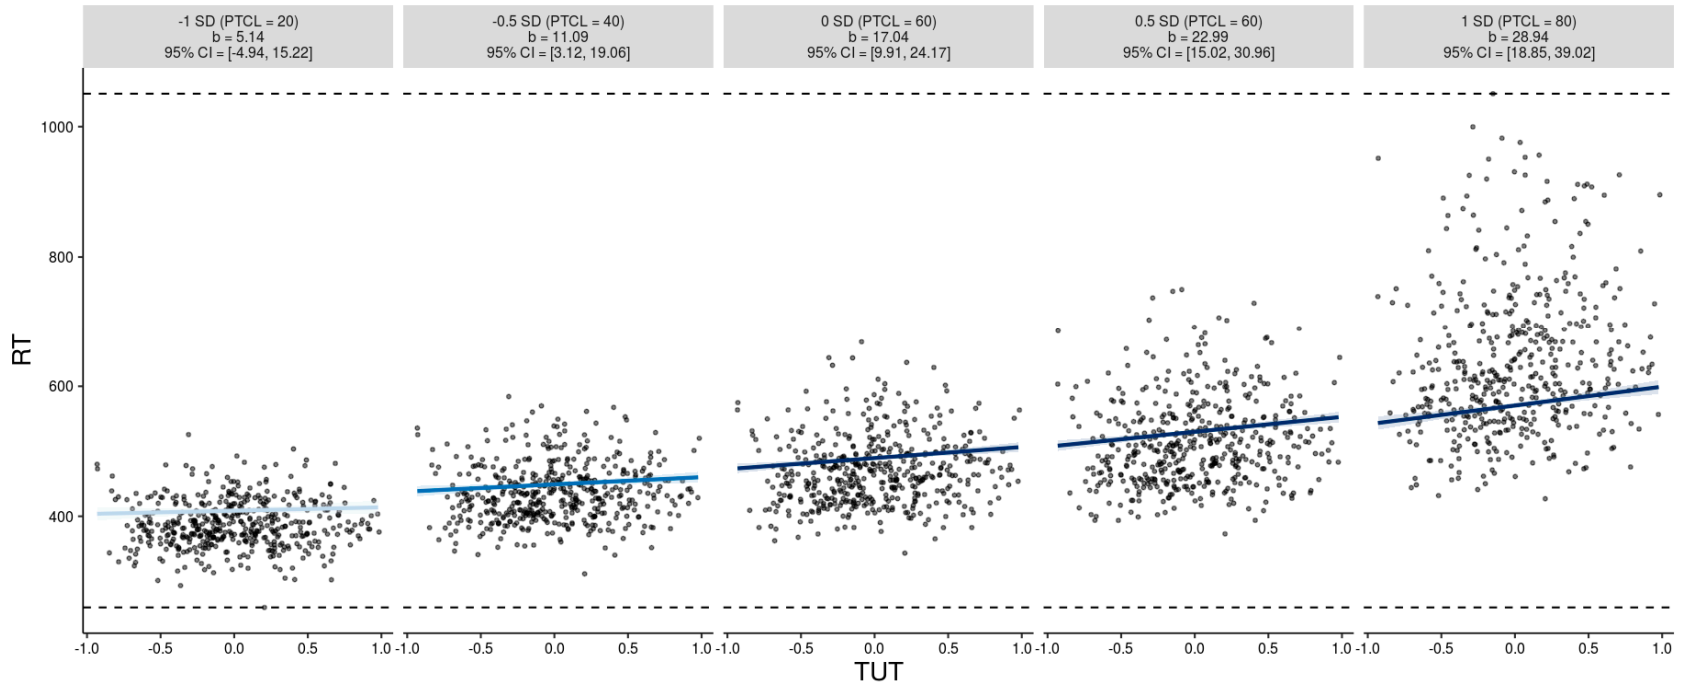

### Circle Flanker TUT x Bin Moderation

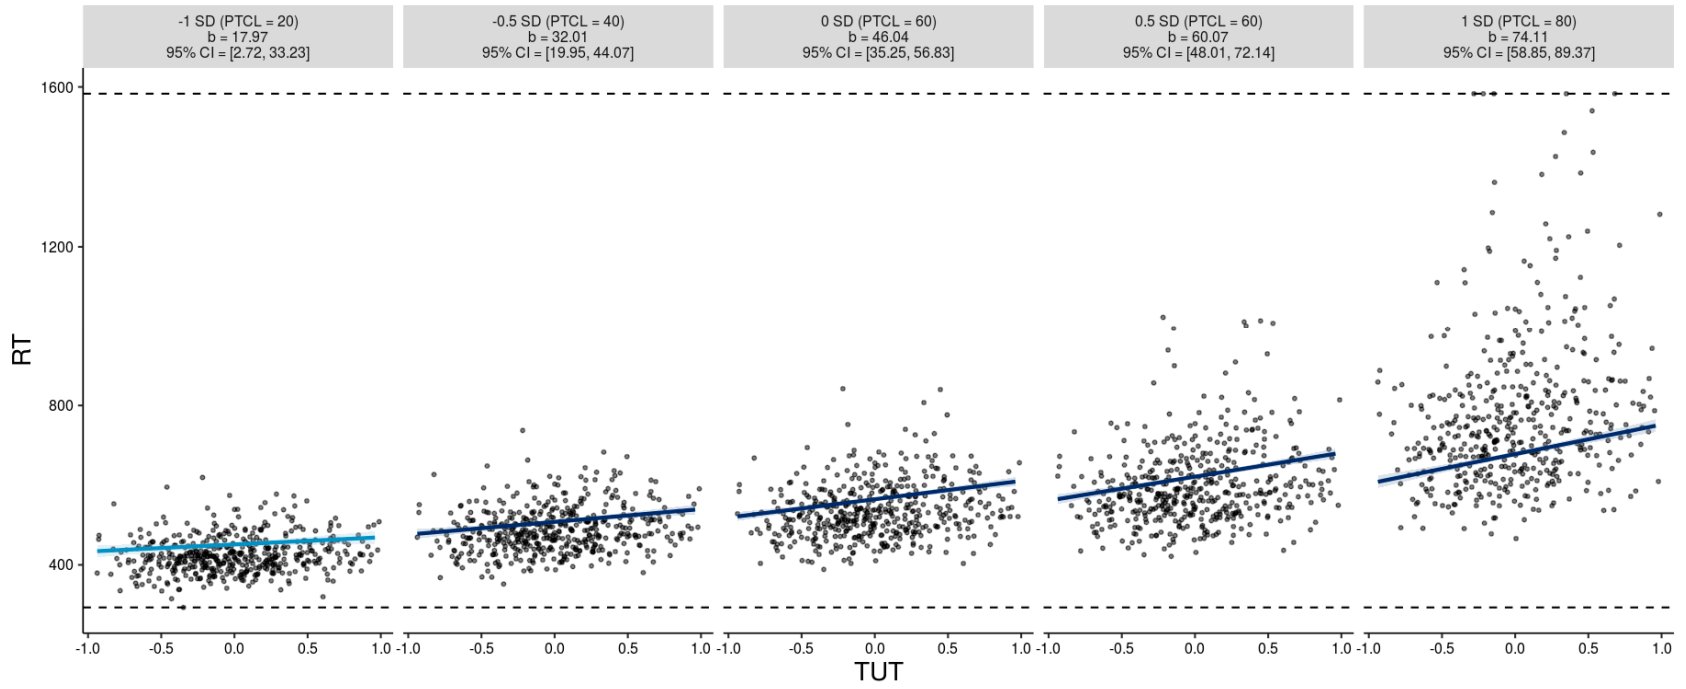

Supplement: jintelligence-08-00025-s001.pdf [file jintelligence-08-00025-s001.pdf]
